# Supplementary material for: Regulation of oxygen vacancy on behaviors of memristors based on amorphous ZnTiSnO films
Source: Royal Society of Chemistry journal article supplement (doi:10.1039/d2tc02242g), 2022-01-01
Supplement: d2tc02242g1.pdf [file d2tc02242g1.pdf]

## Supporting information

### Regulation of Oxygen Vacancy on Behaviors of Memristors Based on Amorphous ZnTiSnO Films

Siqin Li,<sup>a</sup> Jigang Du,<sup>b</sup> Jianguo Lu,<sup>a,\*</sup> Bojing Lu,<sup>a</sup> Fei Zhuge,<sup>c</sup> Ruqi Yang,<sup>a</sup> Yangdan Lu,<sup>a</sup>  
Zhizhen Ye<sup>a,\*</sup>

<sup>a</sup> State Key Laboratory of Silicon Materials, School of Materials Science and Engineering, Zhejiang University, Hangzhou 310027, China

<sup>b</sup> College of Chemical and Biological Engineering, Zhejiang University, Hangzhou 310027, China

<sup>c</sup> Ningbo Institute of Materials Technology and Engineering, Chinese Academy of Sciences, Ningbo 315201, China

Corresponding Authors:

E-mail: lujianguo@zju.edu.cn (Jianguo Lu);

yezz@zju.edu.cn (Zhizhen Ye)

**Figure section**

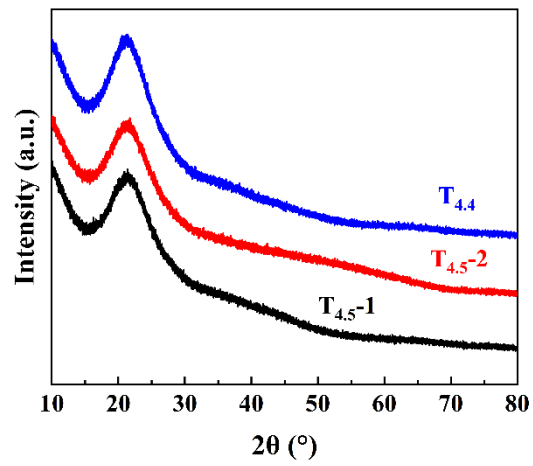

**Fig. S1** XRD spectrums of as-deposited ZnTiSnO films prepared in parallel at 4.5 Pa and 4.4 Pa. The black and red curves are sampled to different regions of the 4.5 Pa film, while the blue represents the curve of the 4.4 Pa sample as a control.

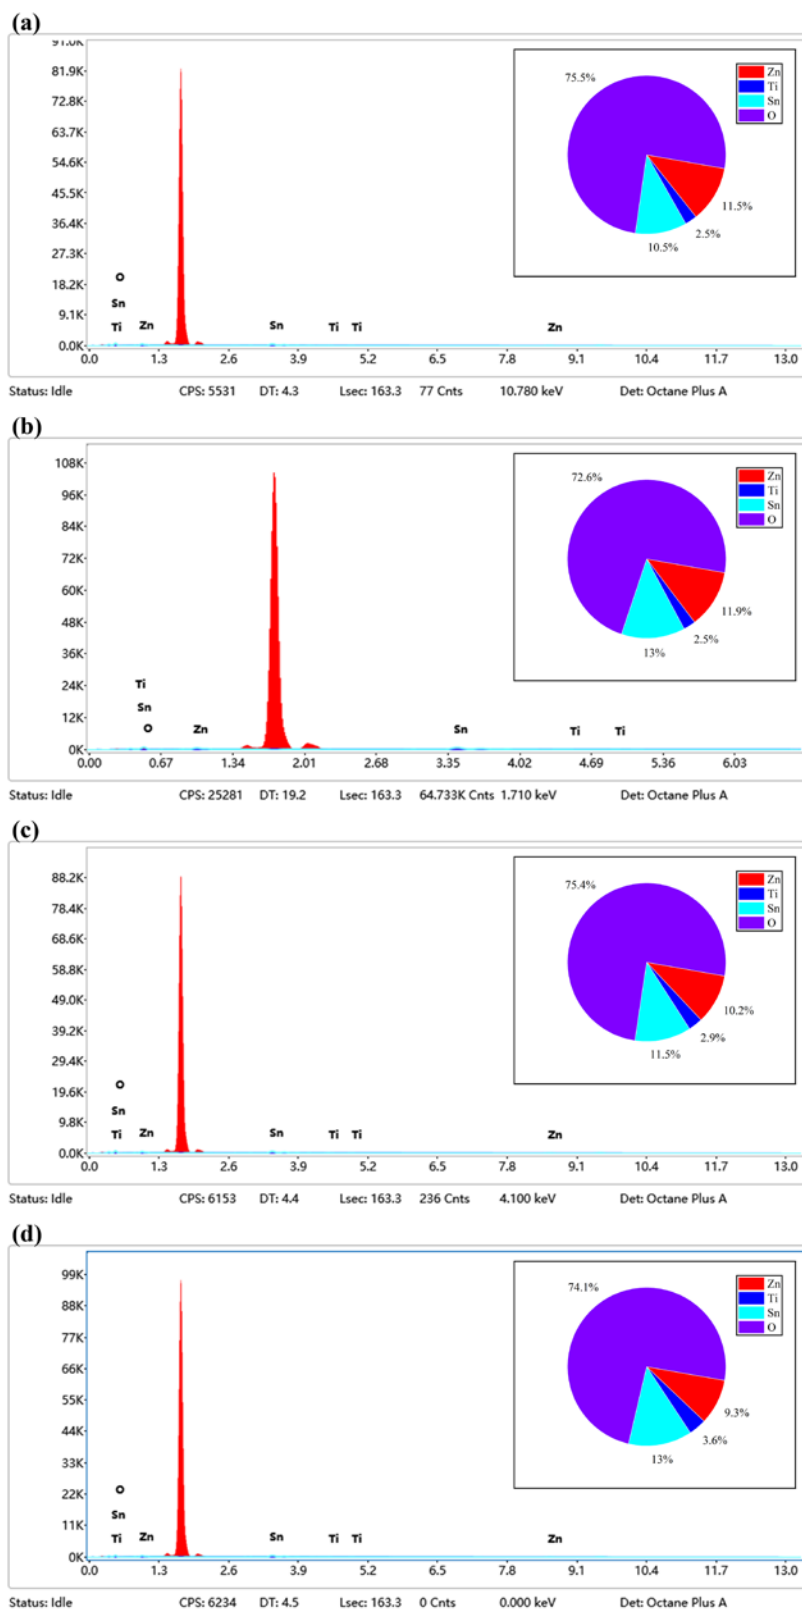

**Fig. S2** Element ratios on the surface of amorphous ZnTiSnO thin films prepared at different oxygen pressures: (a) 4.5 Pa; (b) 4.4 Pa; (c) 1.8 Pa; (d) 0 Pa.

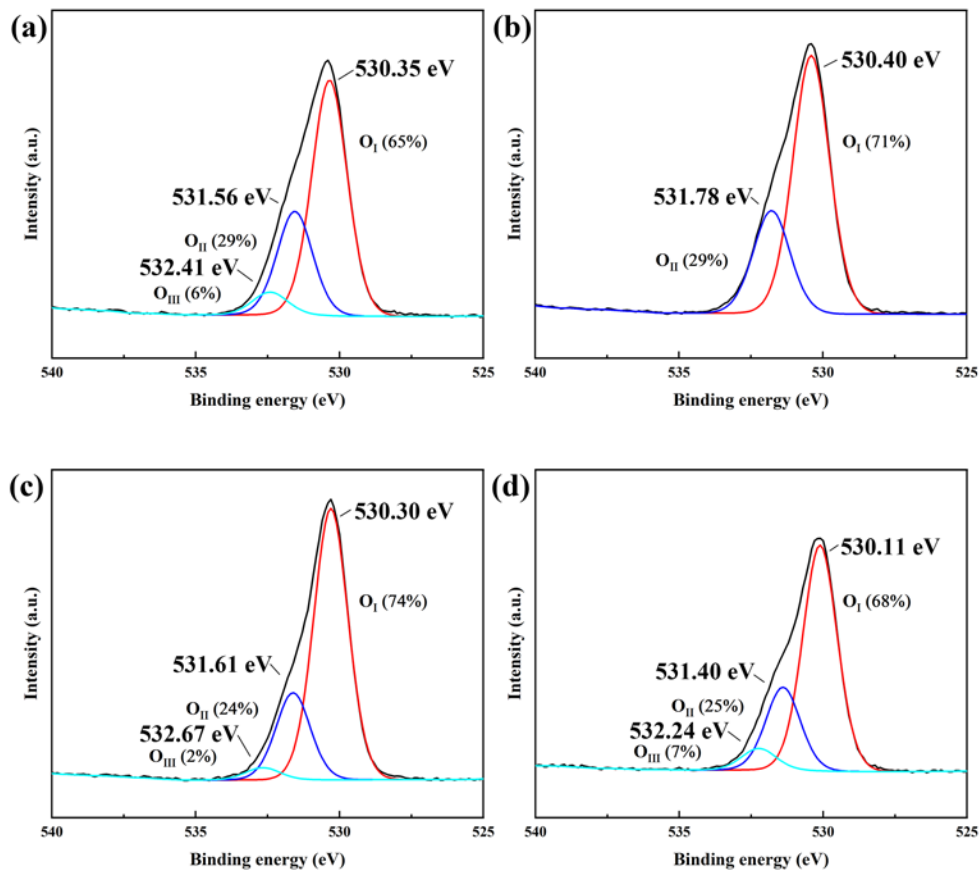

**Fig. S3** O 1s XPS image of Amorphous ZnTiSnO thin films. Oxygen pressure: (a) 4.5 Pa; (b) 4.4 Pa; (c) 1.8 Pa; (d) 0 Pa.

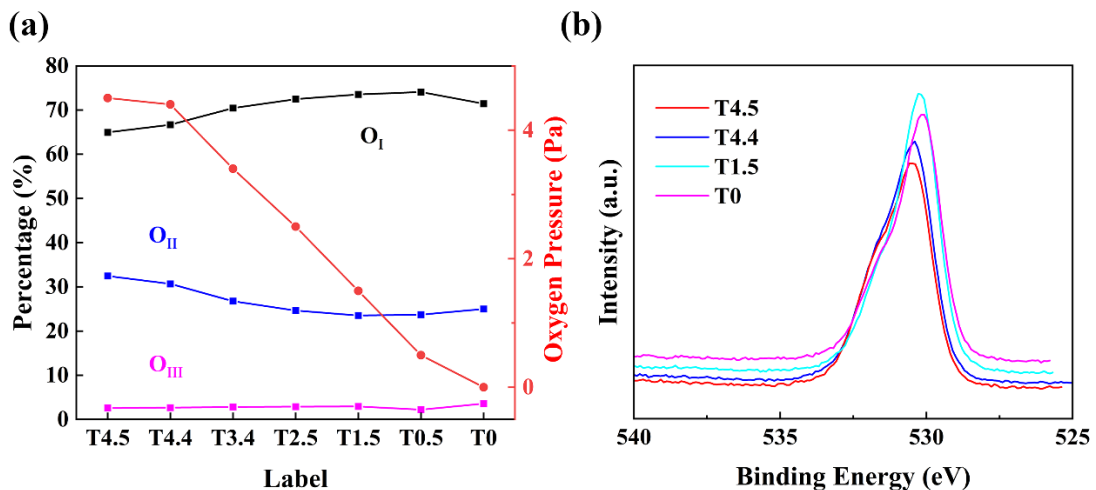

**Fig. S4** Extended XPS characterization of amorphous ZnTiSnO thin films. (a) The variation of O<sub>I</sub>, O<sub>II</sub>, O<sub>III</sub> ratio with the oxygen atmosphere during preparation. (b) Corresponding O 1s peaks.

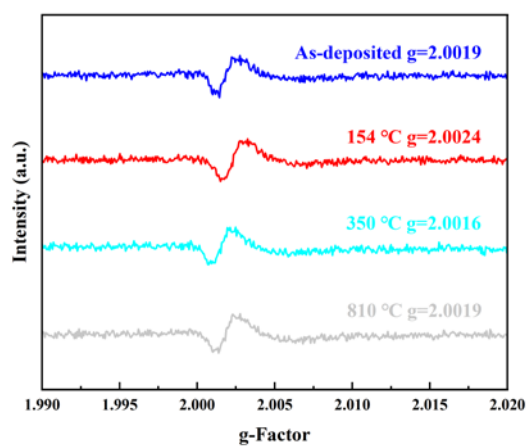

**Fig. S5** Electron spin resonance spectra of amorphous ZnTiSnO thin films (4.4 Pa) annealed at different temperatures.

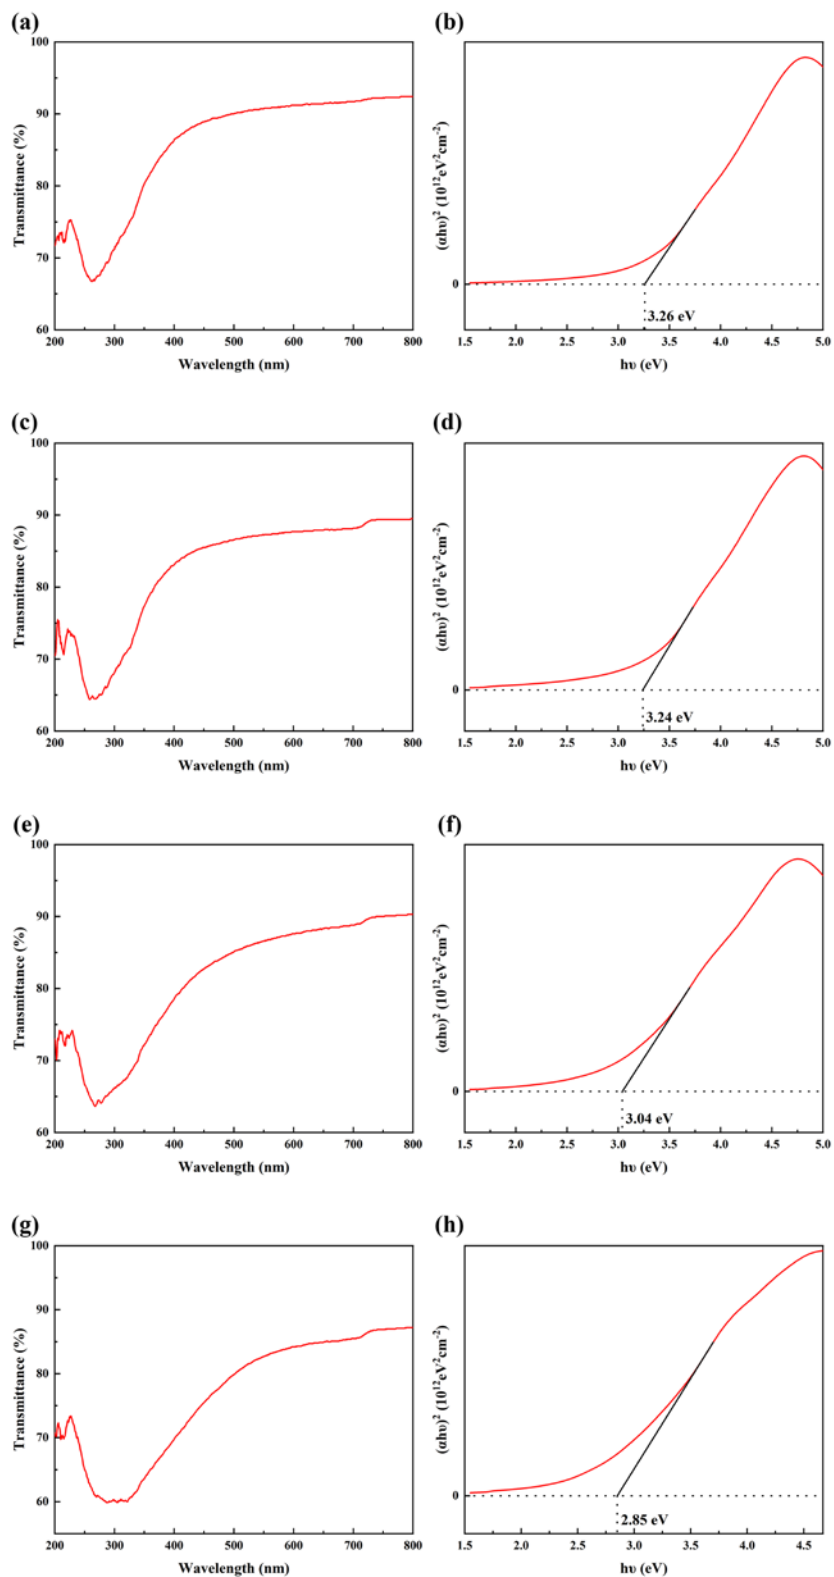

**Fig. S6** Optical transmittance and optical band gap of amorphous ZnTiSnO thin films prepared at different oxygen pressures: (a), (b) 4.5 Pa; (c), (d) 4.4 Pa; (e), (f) 1.8 Pa; (g), (h) 0 Pa.

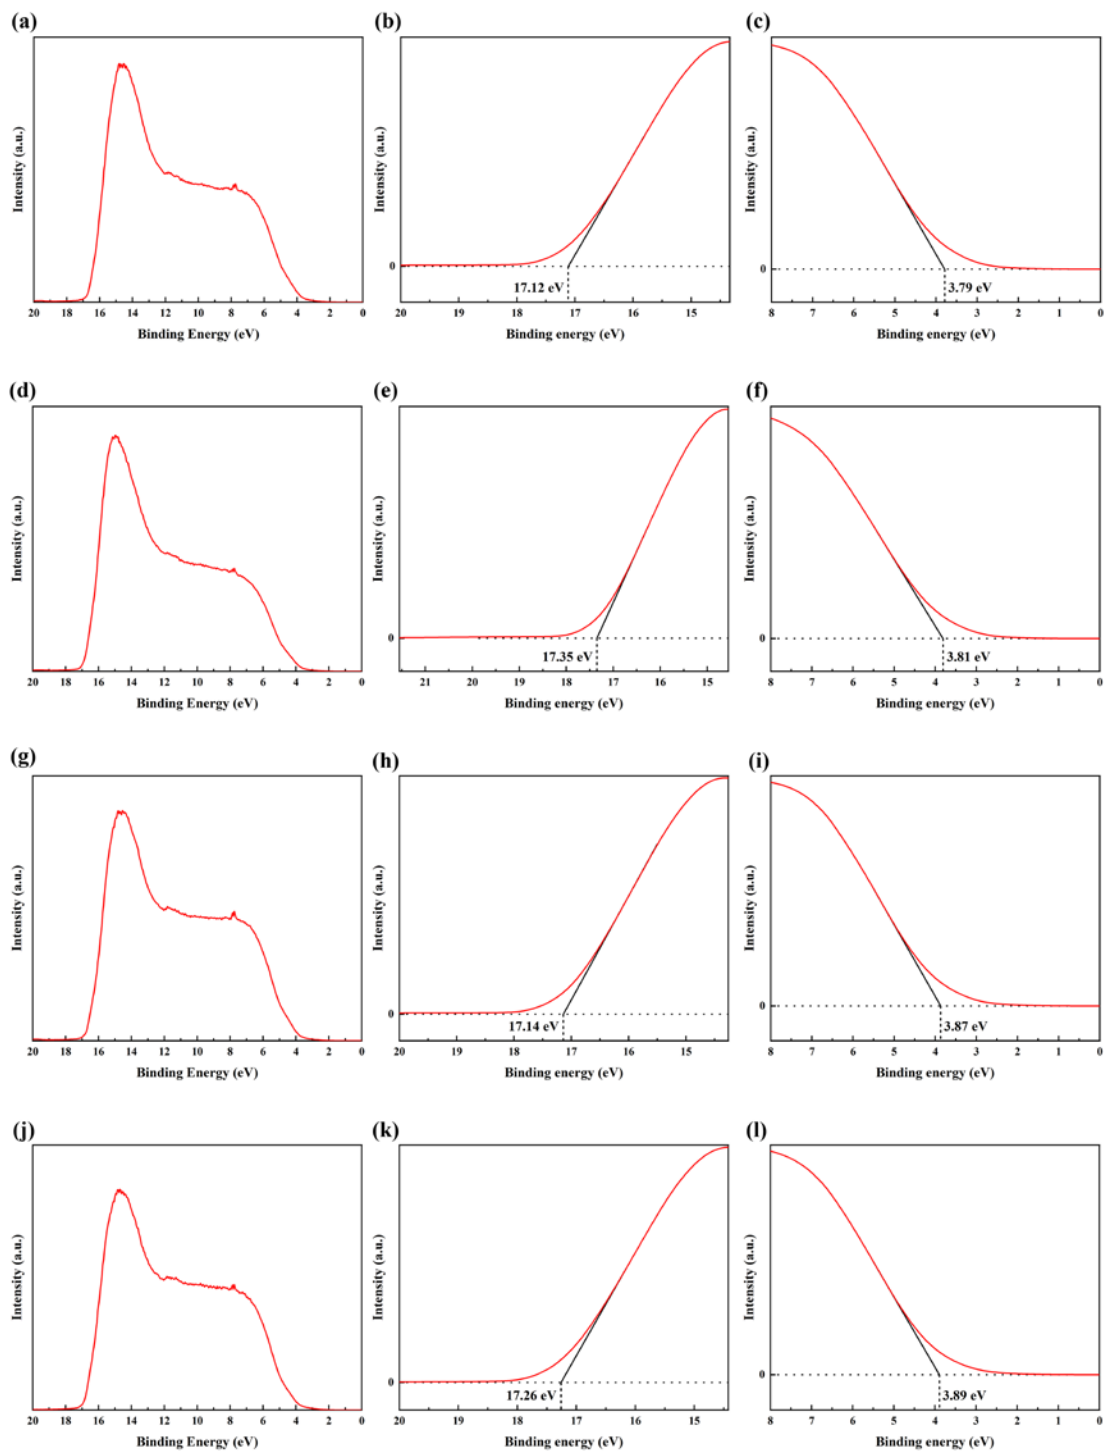

**Fig. S7** Valence band spectra, cutoff edge and Fermi edge of amorphous ZnTiSnO thin films prepared at different oxygen pressures: (a), (b), (c) 4.5 Pa; (d), (e), (f) 4.4 Pa; (g), (h), (i) 1.8 Pa; (j), (k), (l) 0 Pa.
